# Supplementary material for: Improvement of lignin yield and purity from corncob in the presence of steam explosion and liquid hot pressured alcohol
Source: Royal Society of Chemistry journal article supplement (doi:10.1039/c5ra12452b), 2015-01-01
Supplement: c5ra12452b1.pdf [file c5ra12452b1.pdf]

Supporting Information

**Improvement of lignin yield and purity from corncob in the presence of steam explosion and liquid hot  
pressured alcohol**

Xianhong Ouyang,<sup>a</sup> Wenya Wang,<sup>\*a</sup> Qipeng Yuan,<sup>a</sup> Qiuxiang Zhang,<sup>b</sup> Shuangxi Li,<sup>b</sup> Pengxiang Zhao<sup>c</sup>

<sup>a</sup>College of Life Science and Technology, Beijing University of Chemical Technology, Beijing 100029, China.

Email: wangwy@mail.butc.edu.cn

<sup>b</sup>College of Mechanic and Electronic Engineering, Beijing University of Chemical Technology, Beijing 100029,

China

<sup>c</sup>State Grid Energy Conservation Service Co., Ltd., Beijing, 100031, China

### Lignin Acetylation

Acetylation is frequently performed on the residual and cooking liquor lignins. The lignins (dried under vacuum at 40°C for 8-16 hours) were acetylated with acetic anhydride/pyridine (1/1, v/v) at room temperature for 24 hours in 50-ml round-bottom flask. The concentration of the lignin in this solution was approximately 50 mg/ml. After 24 hours, the solution was diluted with ~30 ml of ethanol and stirred for an additional 30 minutes, after which the solvents were removed with a rotary evaporator. Repeated addition and removal of ethanol allowed for the removal of acetic acid and pyridine from the sample. The residue was then dissolved in chloroform, washed twice with filtered deionized water in a separatory funnel, and dried with anhydrous sodium sulfate. The chloroform solution (~10 ml) was added drop-wise to approximately 150 ml of anhydrous ether and the product collected as a precipitate. The precipitate was washed twice with ether, each time being collected by centrifugation. The precipitate was dried under high vacuum at 40°C for 24 hours.

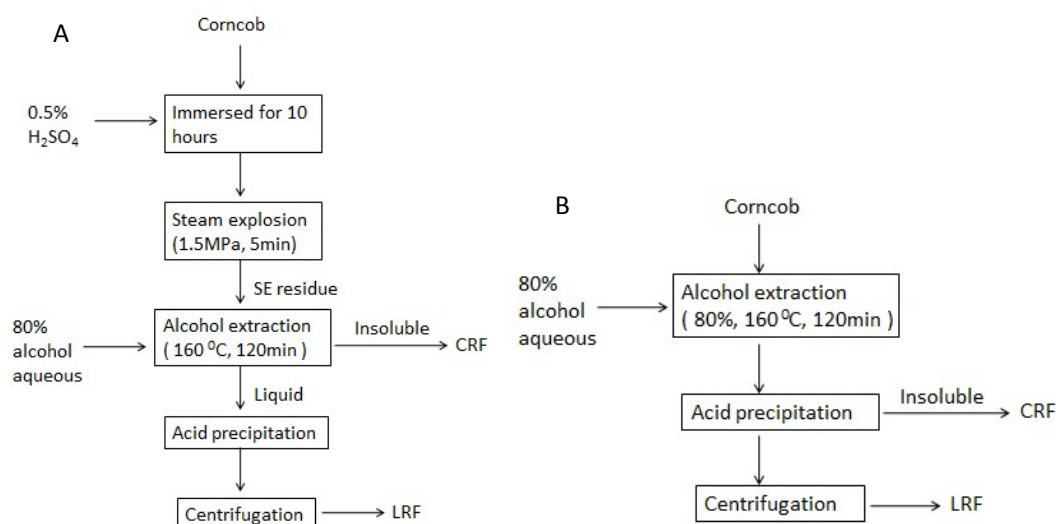

**Fig.S1** Schematic representation of the work flow for corncob treatment: (A) the combination of DASE and LHPAD (lignin yield 40.94%); (B) single LHPAD process (lignin yield 6.81%).

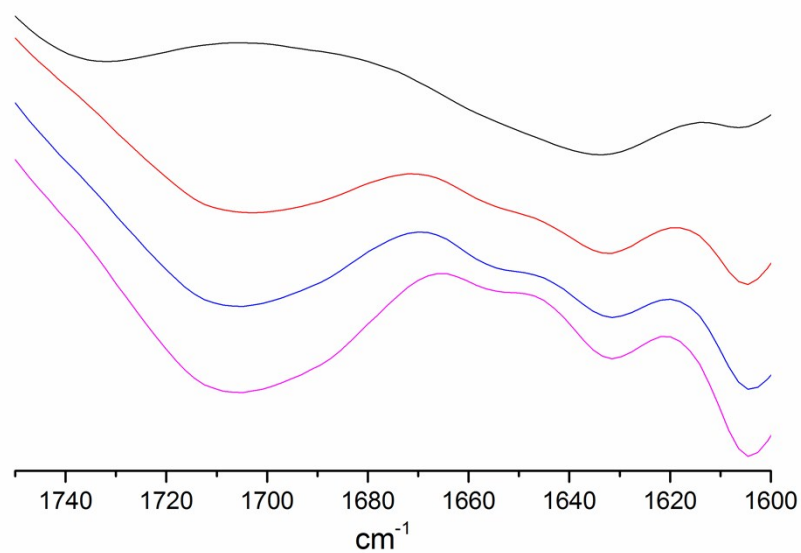

**Fig. S2** The FTIR spectrum of UC (black), SER (red), CRF (blue), LRF (pink).

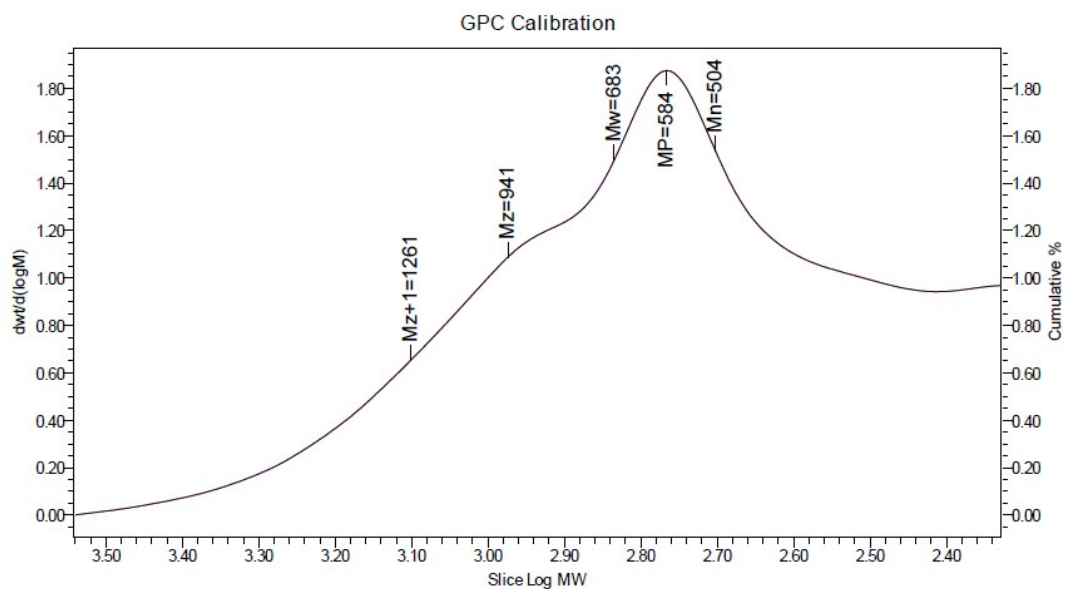

**Fig. S3** Gel permeation chromatograms of lignin rich fraction (LRF) in water phase measured with UV detector.

**Table. S1.** Assignments of  $^{13}\text{C}$ - $^1\text{H}$  correlation signals in the HSQC spectrum of the LRF.

| Lable              | $\delta\text{C}/\delta\text{H}$ (ppm) | Assignment                                                                                |
|--------------------|---------------------------------------|-------------------------------------------------------------------------------------------|
| $-\text{OCH}_3$    | 56.0/3.72                             | C-H in methoxyls (MeO)                                                                    |
| $\text{I}_\gamma$  | 61.4/4.05                             | $\text{C}_\gamma\text{-H}_\gamma$ in cinnamyl alcohol ending groups                       |
| $\text{A}'_\gamma$ | 62.7/4.28                             | $\text{C}_\gamma\text{-H}_\gamma$ in $\gamma$ -acylated $\beta$ -O-4 linkages             |
| $\text{S}_{2,6}$   | 104.1/6.67                            | $\text{C}_{2,6}\text{-H}_{2,6}$ in syringyl unit(S unit)                                  |
| $\text{G}_2$       | 111.3/7.02                            | $\text{C}_2\text{-H}_2$ in guaiacyl unit (G unit)                                         |
| $\text{G}_5$       | 115.4/6.69                            | $\text{C}_5\text{-H}_5$ in guaiacyl units (G unit)                                        |
| $\text{G}_6$       | 119.0/6.79                            | $\text{C}_6\text{-H}_6$ in guaiacyl units (G unit)                                        |
| $\text{G}'_6$      | 123.3/7.60                            | $\text{C}_6\text{-H}_6$ in oxidized ( $\text{C}_\alpha=\text{O}$ ) guaiacyl unit          |
| $\text{P}_7$       | 144.1/7.43                            | $\text{C}_7\text{-H}_7$ in <i>p</i> -coumaroylated substructure                           |
| $\text{P}_{2,6}$   | 130.2/7.48                            | $\text{C}_{2,6}\text{-H}_{2,6}$ in <i>p</i> -coumaroylated substructure                   |
| $\text{P}_{3,5}$   | 115.4/6.78                            | $\text{C}_3\text{-H}_3$ , $\text{C}_5\text{-H}_5$ in <i>p</i> -coumaroylated substructure |
| $\text{H}_{2,6}$   | 128.2/7.16                            | $\text{C}_{2,6}\text{-H}_{2,6}$ in <i>p</i> -hydroxyphenyl unit                           |
